# Supplementary material
Source: PubMed Central journal article supplement (PMC6393663)
Supplement: NIHMS1515498-supplement-4.pdf [file NIHMS1515498-supplement-4.pdf]

## Supplemental item titles and legends for items not included in the main

### supplemental PDF

#### **Data S1. Additional Information on Genomic Features of Parrot Genomes. Related to STAR Methods.**

Excel table containing nine tabs describing: (A) Gene predictions: gene predictions for *Amazona aestiva* with orthology information from other avian species; (B) MiRNAs: predicted microRNAs for *Amazona aestiva* with orthology information from other avian species; (C) Microsatellites: microsatellite loci and primers for use in population genetics studies of *Amazona aestiva*; (D) dn/ds analysis: complete list of genes with significantly differential rates of evolution in high-longevity birds versus regular-longevity birds; (E) Positive selection analysis: genes containing positively selected sites in the longevity analysis of avian species; (F) Parrot novel paralogs: novel genes shared broadly across parrots; (G) Parrot gene expansions: novel gene family expansions unique to parrots that have undergone multiple rounds of duplication; (H) Parrot *de novo* novel genes: list of parrot gene predictions with no evidence of an ortholog in non-parrot species; (I) *Amazon* novel genes: gene duplications, expansions, and *de novo* novel gene predictions unique to *Amazona aestiva*.
